# Supplementary material
Source: PubMed Central journal article supplement (PMC4432056)
Supplement: JCM.02702-14_zjm999094278so1.pdf [file JCM.02702-14_zjm999094278so1.pdf]

1 **Supplementary table 1 – Risk categories in the Dutch WIP guideline on MRSA**

2

December 2012

| Patients                                                                                                                                                                                                                                                                                                                                                                                                                                                                                                                                                                                                                                                                                                                                                                                                                                                                                                                | Healthcare workers                                                                                                                                                                                                                                                                                                                                                                                                                                 |
|-------------------------------------------------------------------------------------------------------------------------------------------------------------------------------------------------------------------------------------------------------------------------------------------------------------------------------------------------------------------------------------------------------------------------------------------------------------------------------------------------------------------------------------------------------------------------------------------------------------------------------------------------------------------------------------------------------------------------------------------------------------------------------------------------------------------------------------------------------------------------------------------------------------------------|----------------------------------------------------------------------------------------------------------------------------------------------------------------------------------------------------------------------------------------------------------------------------------------------------------------------------------------------------------------------------------------------------------------------------------------------------|
| <p><b>Category 1</b></p> <ul style="list-style-type: none"> <li>- Proven carrier status of MRSA</li> <li>- Follow-up after MRSA eradication therapy (3 follow-up culture-sets)</li> </ul>                                                                                                                                                                                                                                                                                                                                                                                                                                                                                                                                                                                                                                                                                                                               | <p><b>Category 1</b></p> <ul style="list-style-type: none"> <li>- Proven carrier status of MRSA</li> <li>- Follow-up after MRSA eradication therapy (3 follow-up culture-sets)</li> <li>- Undergoes MRSA eradication treatment</li> </ul>                                                                                                                                                                                                          |
| <p><b>Category 2</b></p> <ul style="list-style-type: none"> <li>- &lt; 2 months ago unprotected contact with MRSA carrier inside (as part of contact tracing) or outside (household members, partners, caretakers of MRSA carriers) the hospital</li> <li>- Nursed &lt; 2 months &lt; 24h in a foreign care facility with at least one of the following risk factors: operation abroad, chronic infection or persistent skin lesions, presence of abscesses or furuncles at hospitalization in the NL.</li> <li>- Foreign dialysis patients</li> <li>- Stayed &lt; 2months ago in a Dutch care facility (unspecified) with an ongoing MRSA outbreak on the department</li> <li>- Adopted children from abroad living in the Netherlands</li> <li>- Contact with industrial, live pigs, veal calves or broiler chickens regardless whether this contact was professional or not, and/or lives on such a farm.</li> </ul> | <p><b>Category 2</b></p> <ul style="list-style-type: none"> <li>- Nursed &lt; 2 months &gt; 24h in a foreign care facility</li> <li>- Nursed &lt; 2 months &lt; 24h in a foreign care facility with at least one of the following risk factors: operation abroad, chronic infection or persistent skin lesions, presence of abscesses or furuncles at hospitalization in the Netherlands.</li> </ul>                                               |
| <p><b>Category 3</b></p> <ul style="list-style-type: none"> <li>- Unprotected contact with MRSA positive HCW &lt; 2 months ago</li> <li>- Dutch dialysis patients dialyzed abroad &lt; 2 months ago</li> <li>- Nursed &gt; 2 months in foreign hospital with persistent skin infections or risk factors</li> <li>- First year of follow-up after MRSA eradication therapy and the first three negative</li> </ul>                                                                                                                                                                                                                                                                                                                                                                                                                                                                                                       | <p><b>Category 3</b></p> <ul style="list-style-type: none"> <li>- Persistent exposure with a negative MRSA test less than three months ago.</li> <li>- Unprotected contact with MRSA positive patient &lt; 2 months ago inside or outside the hospital</li> <li>- &lt; 2 months ago &gt; 24h patient-related activities in a foreign care facility</li> <li>- Guided patients &lt; 2 months ago from a foreign to a Dutch care facility</li> </ul> |

follow-up culture-sets

- Persistent exposure with a negative MRSA test less than three months ago.

without isolation precautions

- Carrier with uncomplicated MRSA who was negative before the start of MRSA eradication therapy

**Category 4**

- None of the above categories applies

**Category 4**

- None of the above categories applies

---

3

4

WIP: Dutch Workingparty on Infection Prevention. MRSA: Methicillin resistant *Staphylococcus aureus*. HCW: Healthcare worker. The guideline became effective in

5

December 2012.
