# Supplementary material
Source: PubMed Central journal article supplement (PMC4432056)
Supplement: JCM.02702-14_zjm999094278so2.pdf [file JCM.02702-14_zjm999094278so2.pdf]

## Supplementary table 2 – Additional risk factors after literature search

The following risk factors were added to the questionnaire in addition to the risk factors described in the WIP guideline on MRSA (2012).

- Activities deployed in relation to water (frequent beach, lake visits, frequent use of saunas or whirlpools)
- Animal contact (livestock species, household animals and other; which animals, where and how many animals)
- Antibiotic use (< or > 6 months)
- Broken skin barrier (eczema, tattooing, other)
- Comorbidity (CF, HIV, COPD, etc.)
- Crowding and close contact situations (households, material sharing such as bedding, pillows and towels)
- Drug abuse
- Ethnicity (Adoption, immigration)
- Hospital residence or visit
- Hospital residence or visit abroad (> 2 months ago)
- Long care term facility residence or visit
- Meat consumption (Vegetarian or not)
- Occupation (livestock related or not; specified which job and whether currently active or not)
- Sports (contact, group, individual; specified which sport)
