# Supplementary material
Source: PubMed Central journal article supplement (PMC4432056)
Supplement: JCM.02702-14_zjm999094278so3.pdf [file JCM.02702-14_zjm999094278so3.pdf]

1 **Supplementary table 3 – Primers for mobile genetic elements**

2

| Gene         | # | Sequence                         | Base pairs |
|--------------|---|----------------------------------|------------|
| <i>chp</i>   | 1 | TTTACTTTTGAACCGTTTCCTAC          | 365        |
|              | 2 | CGTCCTGAATTCTTAGTATGCATATTCATTAG |            |
| <i>scn</i>   | 1 | AGCACAAGCTTGCCAACATCG            | 259        |
|              | 2 | TTAATATTTACTTTTTAGTGC            |            |
| $\phi$ 3 int | 1 | TCCGGCTTCTTTGAAAATGT             | 220-323    |
|              | 2 | CCGGAAAACCTACGAAGTCA             |            |
| $\phi$ 6 int | 1 | CCT TGA ATT GAT GGC GAT TT       | 202        |
|              | 2 | TTG CTG GGG CTG TAG AAG TT       |            |
| $\phi$ 7 int | 1 | TTCTGGCGCTTCCTTTAAT              | 509        |
|              | 2 | AACACAGTCAAGCATAACGCCT           |            |
| <i>rep7</i>  | 1 | GCACTGCGGATAGAGCAATA             | 168        |
|              | 2 | GCAATTGTTTTTCGTTTCGCT            |            |
| <i>rep27</i> | 1 | TTCGGTTGGATCAATTTCTTT            | 619        |
|              | 2 | TTTTGTCCTGTCTGTGCTTGG            |            |
| <i>cadDX</i> | 1 | TGATGTGATCTGTGTACATGAGGA         | 207        |
|              | 2 | TGATGTGAAGTTGAAGCAACA            |            |

3

4 Numbers 1 and 2 are forward and backward primer respectively. Base pair product size on the

5 right of the table. Primers for *chp* and *scn* obtained from W. van Wamel. Primers for  $\phi$ 6 int,  $\phi$ 7

- 6 *int*, *rep7* and *rep27* from J. Lindsey and A. McCarthy. Primers for  $\phi 3$  *int* and *cadDX* were made
- 7 with primer3 software (<http://frodo.wi.mit.edu/>).
