# Supplementary material
Source: PubMed Central journal article supplement (PMC4432056)
Supplement: JCM.02702-14_zjm999094278so4.pdf [file JCM.02702-14_zjm999094278so4.pdf]

1 **Supplementary table 4 – PCR programs**

2

| Gene          | PCR program |          |        |          |        |          |           |          |         |          |
|---------------|-------------|----------|--------|----------|--------|----------|-----------|----------|---------|----------|
|               | T (°C)      | Time (s) | T (°C) | Time (s) | T (°C) | Time (s) | T (°C)    | Time (s) | T (°C)  | Time (s) |
| <i>chp</i>    | 94          | 240      | 94     | 30       |        |          |           |          |         |          |
|               | 1 cycle     |          |        |          |        |          | 30 cycles |          | 1 cycle |          |
| <i>scn</i>    | 94          | 240      | 94     | 30       | 50     | 30       | 72        | 60       | 72      | 120      |
|               | 1 cycle     |          |        |          |        |          | 30 cycles |          | 1 cycle |          |
| <i>φ3 int</i> | 94          | 300      | 94     | 15       | 50     | 30       | 72        | 60       | 72      | 120      |
|               | 1 cycle     |          |        |          |        |          | 35 cycles |          | 1 cycle |          |
| <i>φ6 int</i> | 95          | 120      | 95     | 15       | 62     | 15       | 72        | 30       | 72      | 600      |
|               | 1 cycle     |          |        |          |        |          | 35 cycles |          | 1 cycle |          |
| <i>φ7 int</i> | 95          | 120      | 95     | 15       | 62     | 15       | 72        | 30       | 72      | 600      |
|               | 1 cycle     |          |        |          |        |          | 35 cycles |          | 1 cycle |          |
| <i>rep7</i>   | 95          | 120      | 95     | 15       | 62     | 15       | 72        | 30       | 72      | 600      |
|               | 1 cycle     |          |        |          |        |          | 35 cycles |          | 1 cycle |          |
| <i>rep27</i>  | 95          | 120      | 95     | 15       | 60     | 15       | 72        | 30       | 72      | 600      |
|               | 1 cycle     |          |        |          |        |          | 35 cycles |          | 1 cycle |          |
| <i>cadDX</i>  | 94          | 300      | 92     | 30       | 60     | 15       | 72        | 30       | 72      | 600      |
|               | 1 cycle     |          |        |          |        |          | 35 cycles |          | 1 cycle |          |

3

4 T is temperature in degrees Celsius. Time is in seconds. Cycles are the number of repeats of time and  
 5 temperature instructions. The table is read from left to right.

6
